# Supplementary material
Source: PubMed Central journal article supplement (PMC9669127)
Supplement: NIHMS1826141-supplement-Supplemental_Publication_Material.pdf [file NIHMS1826141-supplement-Supplemental_Publication_Material.pdf]

# EVOLVING CONCEPTS IN UROMODULIN BIOLOGY, PHYSIOLOGY, AND ITS ROLE IN DISEASE: A TALE OF TWO FORMS

Kaice A. LaFavers, Radmila Micanovic, Angela R. Sabo, Lauren A. Maghak, and Tarek M. El-Achkar

## SUPPLEMENTARY MATERIALS

### Table of Contents

#### Supplemental Text

- Uromodulin Biology
  - Structure of Uromodulin
  - Biosynthesis
  - Cellular trafficking and polarized secretion
  - Polymerization of uromodulin is a highly regulated process
- Uromodulin expression and production
  - How to report uromodulin expression and production by the kidney
  - Experimental interventions that regulate uromodulin expression
  - Genetic factors determining uromodulin expression and secretion
- Overview of functions and sites of action of uromodulin
  - Role of uromodulin in AKI: a vicious cycle where AKI causes uromodulin deficiency and uromodulin deficiency increases the risk and severity of AKI
  - Novel molecular insights into the impact of uromodulin to limit stress signaling systemically and in proximal tubules
  - The role of uromodulin in adaptive vs. maladaptive repair and AKI to CKD transition
  - Role of uromodulin in CKD
  - Uromodulin in infections and immunity
- Future challenges: a call to action

#### Supplemental References

**Supplemental Table 1: Effect of experimental interventions on uromodulin expression and secretion rate and concentration in kidney urine and circulation**

**Supplemental Table 2: Demographic and disease variable association with uromodulin expression and production**

**Supplemental Table 3: Association of laboratory parameters with uromodulin levels**

**Supplemental Table 4: Association of single nucleotide polymorphism (SNP) variants with uromodulin expression and levels**

**Supplemental Table 5: Association of uromodulin levels with outcomes**

Author correspondence:

**Kaice A. LaFavers** ([klafaver@iupui.edu](mailto:klafaver@iupui.edu)) & **Tarek M. El-Achkar** ([telachka@iu.edu](mailto:telachka@iu.edu))  
950 W Walnut St  
Indiana University School of Medicine  
Indianapolis, IN, 46033, USA

## **Uromodulin Biology**

### Structure of Uromodulin

The UMOD gene is transcribed and translated into a precursor protein composed of 640 amino acids (AA) (**Figure 1A**). Motifs identified in the Uromodulin primary sequence include a signal peptide (AA 1–24), one epidermal growth factor-like (EGF-like) domain (AA 31–64), two calcium-binding EGF-like domains (AA 65–107 and 108–149), a D8C domain containing eight conserved cysteines (AA 199–287), a fourth EGF-like domain (AA 295–319), one bipartite zona pellucida (ZP)-like domain (AA 334–585), a stretch of mostly hydrophobic amino acids (586–640) that include a consensus cleavage site (AA 587, cleavage at this site by hepsin is essential for polymerization), an external hydrophobic patch (EHP, AA 598–607), and a signal for a glycosylphosphatidylinositol (GPI) anchor (AA 614). The ZP-like domain is essential for assembly into extracellular urinary polymers of supramolecular structure and is composed of the ZP-N (AA 334–426) and ZP-C (AA 505–585) subdomains, separated by 2 small internal hydrophobic patch (IHP) domains at AA 430–436 and 456–462. The 3D structure of a single uromodulin molecule is predicted using AlphaFold<sup>1</sup> and shown in **Figure 1B**. AlphaFold predictions for uromodulin appear to be highly correlative for specific domains, as discussed recently by Jovine<sup>2,3</sup>. The structure of polymerized uromodulin will be discussed more below. There are 48 cysteine residues involved in the formation of 24 intramolecular disulfide bonds<sup>4</sup>.

### Biosynthesis

Uromodulin maturation along the secretory pathway of polarized tubular cells involves extensive glycosylation that accounts for about 30% of the molecular weight of the protein. N-linked glycans are identified on 8 asparagine AA residues at the following locations: 38, 76, 80, 232, 275, 322, 396 and 513<sup>5</sup>. During post-translational processing in the Golgi apparatus, all high mannose glycans are matured to complex carbohydrates and modified by sialylation, fucosylation or sulfation, except at position N275<sup>6</sup>. Due to the preponderance of acidic amino acid residues and high content of sialic acid, uromodulin is a very acidic protein with an isoelectric point of about 3.5<sup>7</sup>. In addition to N-linked glycans, uromodulin also contains O-linked glycans<sup>8</sup>. The significance of these post-translational modifications for protein function is only partially known and is under investigation.

### Cellular trafficking, polarized secretion, and uromodulin forms

The kidney produces and secretes two distinct forms of uromodulin (**Figure 2**): polymerizing uromodulin, lacking the polymerization inhibitory EHP sequence, released by hepsin proteolysis into the urine and non-polymerizing uromodulin with retained EHP sequence, released in the urine and as the major form in the circulation (serum). This is discussed in detail in the main text.

### Polymerization of uromodulin is a highly regulated process

The three-dimensional structure of native uromodulin polymers has been recently described by cryo-electron tomography<sup>4,9</sup>. The human uromodulin filament core has a zig-zag shaped backbone formed by polymerized ZP domains and protruding arms (branches) composed of the EGF and D8C domains. The dissociation of EHP upon hepsin cleavage induces a conformational change in the ZP-N/ZP-C linker region that wraps two monomers interacting head-to-tail (ZP-N-to ZP-C), thereby linking three consecutive monomers. EHP dissociation and head-to tail incorporation of uromodulin monomers into a growing filament are coupled processes that occur in synchrony at the plasma membrane<sup>9</sup>. It is believed that N-glycans likely play a role in polarized sorting to the apical membrane<sup>10</sup>. These novel developments indicate the production of polymerizing uromodulin is a highly regulated process, which is important to consider when studying its physiology and role in disease.

## Uromodulin expression and production

### How to report uromodulin expression and production by the kidney

As the studies on uromodulin have significantly increased in the last few decades, the nomenclature of how to report uromodulin has become blurred. Uromodulin expression is reported from kidney tissue specimens (human, rodents) and can be at the RNA or protein levels (**Table S1**). The heterogeneous distribution of TALs across various areas within the kidney could become a problem when reporting uromodulin expression because it introduces bias. For example, cortical tissue will have less TAL cells than medullary tissue. Accounting for such variability in the analysis is difficult. To address this problem, one could normalize the expression of uromodulin to NKCC2, the latter reflecting the abundance of TAL cells<sup>11</sup>. However, such an approach may introduce additional confounders, as NKCC2 expression is more abundant in the medullary TALs (mTAL) than cortical TALs (cTAL)<sup>12</sup>. Therefore, when using human kidney tissue specimens, it is important to use anatomically and histologically comparable areas to quantify expression at a bulk level, particularly in the cortex where the presence of TAL-rich medullary rays may shift the abundance of uromodulin expression (**Figure 3**). In rodent kidneys, this could be more controllable, by using equivalent areas in the cortex or medulla or include whole kidneys for analysis and adjust for weight. Newer imaging or spatial based RNA/protein approaches or single cell RNA analysis may circumvent these shortcomings since the expression can be normalized at the cell or regional level<sup>13,14</sup>.

Because of complex regulatory mechanisms governing the expression of uromodulin, it is important to standardize the clinical and physiological variables when measurements of this protein are performed. We emphasize that the unadjusted urine concentration of uromodulin has a distinct relevance compared to the uromodulin adjusted to urine Cr. The latter is shown to correlate with timed secretion uromodulin and likely will reflect the rate of secretion<sup>15,16</sup>, hence indicating the appropriateness of the tubular response and reserve. Unadjusted urine uromodulin, which is determined by the rate of secretion, is expected to be very relevant to the functions of uromodulin along the urinary tract, such as TAL impermeability and urinary defense, which may be dependent on specific concentrations of uromodulin in the urine. Of note that some have advocated the reporting of uromodulin adjusted to kidney function<sup>16,17</sup>, and this is discussed further in the main text in the section on uromodulin and nephron mass.

### Experimental interventions that regulate uromodulin expression

Several experimental interventions in humans and rodents that can alter the rate of uromodulin expression or production (reported as Cr adjusted concentration or amount released per time, such as 24 hours) have been reported (**Table S1**). Some of these interventions are not physiologic, such as inducing kidney injury or administration of pharmacological agents. Other interventions such as water or salt loading and administering of hormones such as DDAVP (known to act on TAL cells and regulate osmolarity) offer insights into uromodulin biology. For example, around 40 years ago, Lynn *et al.* studied 5 patients and showed that rate of urinary uromodulin secretion in 2-hour timed collections measured by radioimmunoassay correlated with increased urine volumes induced by water intake<sup>18</sup>. Although the effect of increased water intake and urine volume had variable results in rodents, the link between urine volume and uromodulin production was supported by a large observational study showing that 24-hour Uromodulin levels positively correlated with urine volumes<sup>19</sup>. Administration of AVP, which is known to activate and alter the expression NKCC2 and increase urinary concentration, decreases the expression and rate of secretion of uromodulin<sup>20,21</sup>, but can also cause an initial acute release of uromodulin in the urine<sup>22</sup>. These observations support that the rate of uromodulin production is variable and likely highly regulated by multiple factors such as water intake, urine flow, salt intake and AVP.

### Genetic factors determining uromodulin expression and secretion

The UMOD promoter is likely regulated by a large network of interacting transcription factors<sup>23</sup>. One of those transcription factors, hepatocyte nuclear factor 1  $\beta$  has been shown to activate uromodulin expression<sup>24</sup>. Common SNPs around and within the UMOD gene area have been linked with uromodulin levels in the urine and in the serum, and these are summarized in **Table S4**. There is also a link between variants and uromodulin expression in the kidney, but this link may be context dependent as it is not consistently significant in healthy tissue but becomes significant in the setting of disease<sup>25</sup>. In addition, the regulation of uromodulin expression and/or secretion appears complex, as variants that are far from the UMOD gene even on separate chromosomes have been linked to levels in the urine or circulation (**Table S4**). It is also possible that the variants in the UMOD region regulate other genes. The reader is referred to other resources that discuss these in more details<sup>26,27</sup>.

### **Overview of functions and sites of action of uromodulin**

The functions of Uromodulin are summarized in **Figure 4**. In the main text, we discuss the role of uromodulin in hypertension and vascular biology. In the sections below, we discuss evolving concepts in other areas such as acute kidney injury (AKI), renal and systemic stress signaling, chronic kidney disease (CKD), AKI to CKD transition, systemic and kidney injury, urinary defense and immunomodulation.

### Role of uromodulin in AKI: a vicious cycle where AKI causes uromodulin deficiency and uromodulin deficiency increases the risk and severity of AKI

*AKI causes acute uromodulin deficiency in the kidney and systemically:*

A significant decrease in uromodulin mRNA and protein early after ischemia-reperfusion injury (IRI) has been consistently demonstrated by our group<sup>28,29</sup> and others<sup>30-32</sup>. We have shown that IRI suppresses the transcription and release of uromodulin towards the interstitium and circulation<sup>28</sup>. The magnitude and duration of uromodulin deficiency is proportional to the severity of injury<sup>29</sup> and occurs early. Of note, impaired uromodulin expression also occurs in forms of AKI other than IRI, such as cisplatin toxicity<sup>33</sup>. Therefore, the decrease in uromodulin is a cardinal feature of AKI. The mechanism of the decrease in uromodulin is likely complex and occurs despite relative preservation of TAL cell integrity during injury<sup>34</sup>, which suggests a dynamic response, rather than loss of TAL cells, as a cause for uromodulin deficiency in AKI. This preservation was initially described by Sarfristein *et al.* in ischemic and nephrotoxic injury models<sup>30</sup>. We recently extended these findings to the bedside with specific relevance to non-polymerizing uromodulin, by showing that serum uromodulin levels drop significantly within 18 hours from post-surgical AKI<sup>35</sup>. Furthermore, in a cohort of kidney transplant donors with varying AKI etiologies, Mansour *et al.* that urinary uromodulin is significantly decreased in AKI and the drop is proportional to the severity by KDIGO scoring<sup>36</sup>.

*Uromodulin deficiency increases the severity of AKI:*

We have demonstrated in multiple studies using UMOD<sup>-/-</sup> and UMOD<sup>+/+</sup> mice that uromodulin deficiency itself increases the severity of AKI through upregulation of chemokine signaling in proximal tubules that stimulates neutrophil infiltration and injury<sup>28,34,37</sup>. Specifically, uromodulin deficiency enhances RAC1/JNK/c-Jun signaling and proinflammatory cytokine (CXCL2, IL-23) expression in proximal epithelial cells<sup>34,35,38</sup>. Since basolaterally released uromodulin encounters the renal interstitium before reaching the circulation, the interaction between uromodulin and proximal tubule

stress signaling is likely to be a result of direct paracrine action. Uromodulin is also an important determinant of renal mononuclear phagocyte (MPC) abundance and polarization to M2 phenotype during AKI, with *UMOD*<sup>-/-</sup> mice showing increased M1 inflammatory signaling and decreased macrophage chemokine/growth factor signaling as well as a failure to upregulate M2 signaling during the repair phase of recovery. Furthermore, administration of a non-polymerizing form of uromodulin in mice improved recovery from AKI, and caused an increase in CD206<sup>+</sup> MPCs, suggesting an important role of uromodulin in polarization of MPCs towards a healing phenotype<sup>39</sup>. These results also suggest that uromodulin could be developed as a biological therapeutic for use in clinical AKI. These findings are translating into clinical applications, since we recently showed that low admission plasma uromodulin was correlated with increased risk of in-hospital AKI, independently of kidney function and other co-morbidities<sup>40</sup>. This is in addition to the growing body of literature showing that low serum and urine uromodulin is associated with increased risk of incident kidney disease and progression<sup>41-47</sup> (**Table S5**).

*AKI recovery is associated with overexpression of uromodulin and increase basolateral shift towards interstitium and serum:*

During recovery from AKI, there is a significant increase in uromodulin expression in TAL cells and a shift towards the interstitium and circulation<sup>28</sup>, where uromodulin particularly localizes at the basolateral domain of S3 segments. We showed previously that this increase is essential in terminating inflammatory signaling<sup>28,34</sup>, and that uromodulin is playing an important role in shaping the response of renal MPCs and their potential role in kidney recovery<sup>39</sup>. Since interstitial/serum uromodulin is predominantly hepsin independent<sup>48</sup>, this data suggests that recovery is marked by at least activation of the path to produce non-polymerizing uromodulin. Further studies are needed to define the role of injury on specific forms of uromodulin and better understand the cellular processes that are regulated, so that therapies to modulate production of uromodulin could be developed.

#### *Novel molecular insights into the impact of uromodulin to limit stress signaling systemically and in proximal tubules*

Using unbiased transcriptomics and proteomics, we recently showed that uromodulin deficiency induces oxidative stress in renal proximal tubules (measured by orthogonal methods: peroxide measurements, intravital reporters, redox molecules)<sup>35</sup>. We confirmed that the elevated reactive oxygen species burden caused cellular damage, because of increased lipid oxidation (targeted lipidomics) and by alterations in mitochondrial morphology<sup>35</sup>. These findings further explain the increased susceptibility of *UMOD*<sup>-/-</sup> mice to AKI, particularly by showing that proinflammatory cytokines such as IL-23 are downstream from oxidative injury. Since AKI itself induces uromodulin deficiency, it is possible that the oxidant injury typically seen with AKI is caused by acute uromodulin deficiency. Furthermore, CKD is a state of uromodulin deficiency and could in itself predispose individuals to oxidant injury independently of the level of kidney function.

As discussed, we established that uromodulin inhibited the activation of Rac1/JNK/c-Jun in proximal epithelial cells in the kidney<sup>35</sup>. The transient receptor potential cation channel, subfamily M, member 2 (TRPM2) channel has been linked to activation of Rac1 and its role in oxidant injury within the kidney<sup>49</sup>. TRPM2 is activated by ROS and itself causes more downstream oxidative stress<sup>50</sup>. Therefore, during AKI, there will be a positive feedback loop between TRPM2 and ROS that needs to be interrupted. The plasma membrane presence of TRPM2 makes it an ideal target for interstitial/circulating uromodulin<sup>49</sup>. Indeed, we demonstrated that uromodulin inhibited TRPM2 activity using a HEK-293 recombinant cell line expressing an inducible copy of TRPM2, in which channel-specific activation can be monitored by measuring the kinetics of calcium influx<sup>35</sup>. We also treated *UMOD*<sup>-/-</sup> mice with the TRPM2 inhibitor 2-aminoethoxydiphenyl borate (2-APB) and found that 2-APB significantly lowered systemic oxidative DNA damage in these mice. To extend these findings to AKI,

we showed that pretreatment of both the UMOD<sup>+/+</sup> and UMOD<sup>-/-</sup> mice with 2-APB significantly reduced systemic oxidative damage after IRI. The difference in oxidative damage seen between these mice was lost upon treatment with 2-APB, implying that TRPM2 is a main target for the inhibitory effect of uromodulin on systemic oxidative stress. These developments provide evidence that uromodulin is an important inhibitor of systemic and renal oxidant injury, and its effect occurs through inhibiting the activation of TRPM2.

The implications of these findings have ramifications for CKD, which is a chronic state of uromodulin deficiency<sup>43,51</sup>. Findings from this research may imply that the observed uromodulin deficiency is a major contributor to the pro-inflammatory phenotype and maladaptive responses seen in advanced CKD by inducing systemic oxidative stress<sup>52,53</sup>. The effect of uromodulin deficiency on increased systemic oxidative stress may be a factor in the increased mortality and cardiovascular complications associated with low serum uromodulin levels<sup>54-57</sup> (**Table S5**).

#### *The role of uromodulin in adaptive vs. maladaptive repair and AKI to CKD transition*

AKI is a major cause of CKD<sup>58-62</sup>, and mounting evidence suggests that the transition from AKI to CKD occurs through maladaptive repair<sup>63-65</sup>. After decreased expression of uromodulin during AKI, early recovery is characterized by a significant increase in uromodulin expression in TAL cells and a shift in trafficking towards the interstitium and circulation<sup>28</sup>. We showed previously that this increase is essential in terminating inflammatory signaling, and that recovery in the setting of uromodulin deficiency is significantly delayed<sup>28</sup>. Therefore, it is likely that uromodulin has a role in preventing progression of kidney injury towards fibrosis, and if uromodulin deficiency persists post AKI (examples include very severe AKI or AKI in existing CKD), the outcome will be deleterious. Maydan *et al.* demonstrated that uromodulin reduced KIM-1 levels in human renal adenocarcinoma cells and UMOD<sup>-/-</sup> mice had higher levels of KIM-1<sup>66</sup>. Since persistent KIM-1 expression is associated with maladaptive repair and progression to CKD<sup>67</sup>, it is possible that failure of uromodulin upregulation post AKI could lead towards maladaptive repair. We propose that persistent uromodulin deficiency post AKI promotes fibrosis, possibly through activation of TRPM2 and persistent oxidant injury and activation of a maladaptive repair program. This paradigm is supported by a recent study by Puthumana *et al.*, showing that higher uromodulin levels in the urine 3 months post-hospitalization are associated with decreased risk of incident CKD and CKD progression<sup>68</sup>. This was corroborated by experimental studies showing higher levels of uromodulin in models of repair after AKI<sup>68</sup>.

#### *Role of uromodulin in CKD*

We have discussed previously our interpretation of the data both from experimental models and human clinical studies<sup>27</sup>. Multiple experimental studies, including studies in UMOD<sup>-/-</sup> mice and the recent work by Puthumana *et al.*<sup>68</sup>, have demonstrated a protective role for uromodulin in progressive kidney injury. This was corroborated by observational and prospective clinical studies, supporting that a higher level of uromodulin in the urine or circulation, independently of kidney function (**Table S5**). Based on these data, having higher uromodulin levels at any stage is associated with benefits, and this was also supported by histological data in kidney biopsies where uromodulin production rate was higher in patient with preserved tubules<sup>16</sup>, and that was recently also shown in an experimental model<sup>68</sup>. Interestingly, studies investigating variants in the UMOD locus have suggested an opposite effect, where protective variants have been associated with low levels of urinary and serum uromodulin<sup>11,69,70</sup>. It is possible that the relation between UMOD locus and outcomes is mediated by uromodulin expression and hypertension<sup>11,71</sup>, especially since the link between UMOD variants and expression may depend on disease context and is not very clear in healthy kidney tissue<sup>25</sup>. However, other factors should be considered, particularly with the strong preclinical models of uromodulin deletion<sup>28,72</sup> and the mounting clinical data (**Table S5**), including prospective studies showing that higher uromodulin levels in the urine and serum (independent of kidney function) are associated with

incident kidney disease<sup>42,68</sup>, which argue against a reverse causation mechanism<sup>70</sup>. In fact, the UMOD locus may be independently associated with systemic and kidney outcomes<sup>41,42</sup>. The area around the UMOD loci and surrounding genes is likely a unique site affecting many genes within the kidney that are associated also with kidney function<sup>73</sup>. The independent association between UMOD loci and outcomes need to be further evaluated, and this will help better understand and interpret recent Mendelian randomization studies<sup>69,70</sup>

In summary, despite remaining areas of unclarity but of great importance pertaining to the role of the UMOD loci variants, there is a lot more evidence than not, that uromodulin has a protective role in kidney disease and progression (**Table S5**). Uromodulin is reactively increased in states of injury, and the inability to mount such a functional tubular response confers a bad prognosis. Uromodulin deficiency is more likely a state of high risk for renal and cardiovascular complications, and strategies to mitigate or enhance the abundance of uromodulin in specific settings, particularly as we know more about the differential functions of the polymerizing vs non-polymerizing forms. A better understanding of the role of uromodulin in CKD would then inform the development of therapeutics that could be guided by the level of this protein.

### *Uromodulin in infections and immunity*

Since its discovery in the early 1950's by Tamm and Horsfall, uromodulin's identity as a modulator of the immune response to infectious disease has been well established. It was originally described as an inhibitor of viral hemagglutination<sup>74,75</sup>. Before it was known that the Tamm-Horsfall Protein was identical to uromodulin, it was discovered again in 1985 by Muchmore and Decker, who characterized its urinary form as an inhibitor of T-cell and monocyte activity *in vitro*<sup>76</sup>.

Given its high abundance in the urine, early studies of uromodulin in infection and immunity focused on its potential role in urinary tract infections (UTIs). While early studies in patient populations found that patients with urinary tract infections and pyelonephritis developed autoantibodies to uromodulin<sup>77,78</sup>, by the early 1990's there was growing evidence that levels of aggregated uromodulin were correlated with risk for UTIs<sup>79,80</sup>. This led to studies with purified urinary uromodulin, which was found to bind to type 1-fimbriated *E. coli*<sup>81,82</sup>, likely through its highly conserved high mannose residues<sup>83</sup> which are capable of interacting with the FimH adhesions<sup>84,85</sup>. The development of a uromodulin knockout mouse in the early 2000's further supported a protective role for uromodulin in UTI, as UMOD<sup>-/-</sup> mice showed increased susceptibility to colonization of the bladder by type 1-fimbriated *E. coli*<sup>86</sup>. By 2005, uromodulin was well accepted as protective in the setting of urinary tract infection<sup>87</sup>. Recent studies have reinforced this role, with a prospective longitudinal cohort study demonstrating that higher urinary uromodulin was protective against UTI<sup>88</sup> and an observational cohort study finding that UTI patients with bacteremia were more likely to be unable to produce uromodulin<sup>89</sup>. This has led some to propose that the beneficial effect of higher urinary uromodulin granted a selective advantage to humans living in areas with high pathogen diversity or prevalence of antibiotic-resistant UTIs, which could explain the high allelic frequency of a UMOD promoter SNP variant that is positively correlated with urinary uromodulin levels, despite the identification of this SNP as a risk factor for CKD<sup>90</sup>. Recent cryo-electron tomography studies have conclusively demonstrated how polymerized uromodulin binds to urinary pathogens to prevent their adhesion to the urinary tract and promote their clearance by presenting specific epitopes able to bind bacterial type 1 pilus adhesins on regularly spaced protruding arms that extend from the uromodulin filament<sup>5</sup>. These findings suggest that devising strategies to enhance the release of polymeric uromodulin in patients with chronic or recurrent UTI could improve outcomes in these patients and further underscores the need to understand the physiological determinants of polymeric uromodulin expression.

Uromodulin's role in immunity and infection extends beyond the urinary tract. Many of the early *in vitro* studies characterizing uromodulin's immune regulatory properties were done with the polymerized urinary form, which appears to be differentially glycosylated in pregnant women<sup>91</sup>. This form acts as a pro-inflammatory molecule, activating the expression of pro-inflammatory cytokines<sup>92</sup> including that of IL-1 $\beta$  through the NLRP3 inflammasome<sup>42</sup> leading to its characterization as a Damage Associated Molecular Pattern (DAMP). Aggregated uromodulin can also bind to components of the complement cascade<sup>93</sup> as well as cytokines<sup>94,95</sup> and tumor necrosis factor<sup>96</sup>, leading some to propose it may act as a cytokine sink. Treatment of neutrophils with urinary uromodulin shows that it can bind to and functionally inhibit neutrophils via Siglec-9, reducing their ability to generate reactive oxygen species, undergo chemotaxis and kill pathogens<sup>97</sup>. However, it is important to note that uromodulin in the serum is primarily not aggregated<sup>39</sup> and thus the extension of these findings beyond the urinary tract should be limited. Indeed, uromodulin knockout mice have multiple immune system defects. These mice have decreased mononuclear phagocyte levels (MPC) within the kidney, and the MPCs that are found in UMOD<sup>-/-</sup> mice have decreased plasticity and phagocytic activity<sup>39</sup>, which inhibits their function in recovery from kidney injury. These mice also exhibit systemic neutrophilia<sup>97</sup> downstream of activation of the IL-23/IL-17 axis<sup>38</sup>. Consistent with these immune defects in mice, lower serum uromodulin is associated with an increased risk of fatal infections from any source in a cohort of coronary angiography patients<sup>54</sup>. Taken together, these results suggest that uromodulin confers protection against infection that extends beyond the urinary tract. Furthermore, systemic levels of uromodulin increase in humans and animal models of sepsis, and we recently showed that circulating uromodulin is protective in this setting<sup>98</sup>.

### **Future challenges: a call to action**

There are important roadblocks in the field that hinder more efficient translation and the application of uromodulin as an important theragnostic marker. In particular, it is imperative to develop standardized methods to measure and report uromodulin in the urine and circulation, which will also help define "normal" ranges and perform multicenter studies that allow application of uromodulin measurements to clinical use. Another area of need is to devise a common nomenclature that defines the significance of uromodulin measurements, particularly as indicator of the functional tubular response.



## Supplemental References (SR)

1. Jumper J, Evans R, Pritzel A, Green T, Figurnov M, Ronneberger O, Tunyasuvunakool K, Bates R, Zidek A, Potapenko A, et al. Highly accurate protein structure prediction with AlphaFold. *Nature*. 2021;596:583-589. doi: 10.1038/s41586-021-03819-2
2. Stsiapanava A, Xu C, Nishio S, Han L, Yamakawa N, Carroni M, Tunyasuvunakool K, Jumper J, de Sanctis D, Wu B, et al. Structure of the decoy module of human glycoprotein 2 and uromodulin and its interaction with bacterial adhesin FimH. *Nat Struct Mol Biol*. 2022;29:190-193. doi: 10.1038/s41594-022-00729-3
3. Jovine L. Using machine learning to study protein-protein interactions: From the uromodulin polymer to egg zona pellucida filaments. *Mol Reprod Dev*. 2021;88:686-693. doi: 10.1002/mrd.23538
4. Stsiapanava A, Xu C, Brunati M, Zamora-Caballero S, Schaeffer C, Bokhove M, Han L, Hebert H, Carroni M, Yasumasu S, et al. Cryo-EM structure of native human uromodulin, a zona pellucida module polymer. *EMBO J*. 2020;39:e106807. doi: 10.15252/embj.2020106807
5. Weiss GL, Stanisich JJ, Sauer MM, Lin CW, Eras J, Zyla DS, Truck J, Devuyst O, Aebi M, Pilhofer M, et al. Architecture and function of human uromodulin filaments in urinary tract infections. *Science*. 2020;369:1005-1010. doi: 10.1126/science.aaz9866
6. van Rooijen JJ, Voskamp AF, Kamerling JP, Vliegthart JF. Glycosylation sites and site-specific glycosylation in human Tamm-Horsfall glycoprotein. *Glycobiology*. 1999;9:21-30. doi: 10.1093/glycob/9.1.21
7. Schnierle P, Hering F, Seiler H. Isoelectric focusing of Tamm-Horsfall glycoproteins: a simple tool for recognizing recurrent calcium oxalate renal stone formers. *Urol Res*. 1996;24:79-82. doi: 10.1007/BF00431083
8. Easton RL, Patankar MS, Clark GF, Morris HR, Dell A. Pregnancy-associated changes in the glycosylation of tamm-horsfall glycoprotein. Expression of sialyl Lewis(x) sequences on core 2 type O-glycans derived from uromodulin. *J Biol Chem*. 2000;275:21928-21938. doi: 10.1074/jbc.M001534200
9. Stanisich JJ, Zyla DS, Afanasyev P, Xu J, Kipp A, Olinger E, Devuyst O, Pilhofer M, Boehringer D, Glockshuber R. The cryo-EM structure of the human uromodulin filament core reveals a unique assembly mechanism. *Elife*. 2020;9. doi: 10.7554/eLife.60265
10. Pang S, Urquhart P, Hooper NM. N-glycans, not the GPI anchor, mediate the apical targeting of a naturally glycosylated, GPI-anchored protein in polarised epithelial cells. *J Cell Sci*. 2004;117:5079-5086. doi: 10.1242/jcs.01386
11. Trudu M, Janas S, Lanzani C, Debaix H, Schaeffer C, Ikehata M, Citterio L, Demaretz S, Trevisani F, Ristagno G, et al. Common noncoding UMOD gene variants induce salt-sensitive hypertension and kidney damage by increasing uromodulin expression. *Nat Med*. 2013;19:1655-1660. doi: 10.1038/nm.3384
12. Lee JW, Chou CL, Knepper MA. Deep Sequencing in Microdissected Renal Tubules Identifies Nephron Segment-Specific Transcriptomes. *J Am Soc Nephrol*. 2015;26:2669-2677. doi: 10.1681/ASN.2014111067
13. Ferkowicz MJ, Winfree S, Sabo AR, Kamocka MM, Khochare S, Barwinska D, Eadon MT, Cheng YH, Phillips CL, Sutton TA, et al. Large-scale, three-dimensional tissue cytometry of the human kidney: a complete and accessible pipeline. *Lab Invest*. 2021. doi: 10.1038/s41374-020-00518-w
14. Ferreira RM, Sabo AR, Winfree S, Collins KS, Janosevic D, Gulbranson CJ, Cheng YH, Casbon L, Barwinska D, Ferkowicz MJ, et al. Integration of spatial and single-cell transcriptomics localizes epithelial cell-immune cross-talk in kidney injury. *JCI Insight*. 2021;6. doi: 10.1172/jci.insight.147703

15. Glauser A, Hochreiter W, Jaeger P, Hess B. Determinants of urinary excretion of Tamm-Horsfall protein in non-selected kidney stone formers and healthy subjects. *Nephrol Dial Transplant*. 2000;15:1580-1587. doi: 10.1093/ndt/15.10.1580
16. Thornley C, Dawnay A, Cattell WR. Human Tamm-Horsfall glycoprotein: urinary and plasma levels in normal subjects and patients with renal disease determined by a fully validated radioimmunoassay. *Clin Sci (Lond)*. 1985;68:529-535. doi: 10.1042/cs0680529
17. El-Achkar TM, Wu XR. Uromodulin in kidney injury: an instigator, bystander, or protector? *Am J Kidney Dis*. 2012;59:452-461. doi: 10.1053/j.ajkd.2011.10.054
18. Lynn KL, Marshall RD. Excretion of Tamm-Horsfall glycoprotein in renal disease. *Clin Nephrol*. 1984;22:253-257.
19. Pruijm M, Ponte B, Ackermann D, Paccaud F, Guessous I, Ehret G, Pechere-Bertschi A, Vogt B, Mohaupt MG, Martin PY, et al. Associations of Urinary Uromodulin with Clinical Characteristics and Markers of Tubular Function in the General Population. *Clin J Am Soc Nephrol*. 2016;11:70-80. doi: 10.2215/CJN.04230415
20. Bachmann S, Dawnay AB, Bouby N, Bankir L. Tamm-Horsfall protein excretion during chronic alterations in urinary concentration and protein intake in the rat. *Ren Physiol Biochem*. 1991;14:236-245. doi: 10.1159/000173411
21. Ecelbarger CA, Terris J, Hoyer JR, Nielsen S, Wade JB, Knepper MA. Localization and regulation of the rat renal Na(+)-K(+)-2Cl- cotransporter, BSC-1. *Am J Physiol*. 1996;271:F619-628. doi: 10.1152/ajprenal.1996.271.3.F619
22. Nanamatsu A, Mori T, Ando F, Furusho T, Mandai S, Susa K, Sohara E, Rai T, Uchida S. Vasopressin Induces Urinary Uromodulin Secretion By Activating PKA (Protein Kinase A). *Hypertension*. 2021;77:1953-1963. doi: 10.1161/HYPERTENSIONAHA.121.17127
23. Srivastava R, Micanovic R, El-Achkar TM, Janga SC. An intricate network of conserved DNA upstream motifs and associated transcription factors regulate the expression of uromodulin gene. *J Urol*. 2014;192:981-989. doi: 10.1016/j.juro.2014.02.095
24. Gresh L, Fischer E, Reimann A, Tanguy M, Garbay S, Shao X, Hiesberger T, Fiette L, Igarashi P, Yaniv M, et al. A transcriptional network in polycystic kidney disease. *EMBO J*. 2004;23:1657-1668. doi: 10.1038/sj.emboj.7600160
25. Hellwege JN, Velez Edwards DR, Giri A, Qiu C, Park J, Torstenson ES, Keaton JM, Wilson OD, Robinson-Cohen C, Chung CP, et al. Mapping eGFR loci to the renal transcriptome and phenome in the VA Million Veteran Program. *Nat Commun*. 2019;10:3842. doi: 10.1038/s41467-019-11704-w
26. Schaeffer C, Devuyst O, Rampoldi L. Uromodulin: Roles in Health and Disease. *Annu Rev Physiol*. 2021;83:477-501. doi: 10.1146/annurev-physiol-031620-092817
27. Micanovic R, LaFavers K, Garimella PS, Wu XR, El-Achkar TM. Uromodulin (Tamm-Horsfall protein): guardian of urinary and systemic homeostasis. *Nephrol Dial Transplant*. 2020;35:33-43. doi: 10.1093/ndt/gfy394
28. El-Achkar TM, McCracken R, Liu Y, Heitmeier MR, Bourgeois S, Ryerse J, Wu XR. Tamm-Horsfall protein translocates to the basolateral domain of thick ascending limbs, interstitium, and circulation during recovery from acute kidney injury. *Am J Physiol Renal Physiol*. 2013;304:F1066-1075. doi: 10.1152/ajprenal.00543.2012
29. Heitmeier M, McCracken R, Micanovic R, Khan S, El-Achkar TM. The Role of Tumor Necrosis Factor Alpha in Regulating the Expression of Tamm-Horsfall Protein (Uromodulin) in Thick Ascending Limbs during Kidney Injury. *Am J Nephrol*. 2014;40:458-467. doi: 000369836 [pii]10.1159/000369836
30. Safirstein R. Gene expression in nephrotoxic and ischemic acute renal failure. *J Am Soc Nephrol*. 1994;4:1387-1395.

31. Yoshida T, Kurella M, Beato F, Min H, Ingelfinger JR, Stears RL, Swinford RD, Gullans SR, Tang SS. Monitoring changes in gene expression in renal ischemia-reperfusion in the rat. *Kidney Int.* 2002;61:1646-1654.
32. Safirstein R, Megyesi J, Saggi SJ, Price PM, Poon M, Rollins BJ, Taubman MB. Expression of cytokine-like genes JE and KC is increased during renal ischemia. *Am J Physiol.* 1991;261:F1095-1101. doi: 10.1152/ajprenal.1991.261.6.F1095
33. Safirstein RL. Acute renal failure: from renal physiology to the renal transcriptome. *Kidney Int Suppl.* 2004:S62-66. doi: 10.1111/j.1523-1755.2004.09110.x
34. El-Achkar TM, McCracken R, Rauchman M, Heitmeier MR, Al-Aly Z, Dagher PC, Wu XR. Tamm-Horsfall protein-deficient thick ascending limbs promote injury to neighboring S3 segments in an MIP-2-dependent mechanism. *Am J Physiol Renal Physiol.* 2011;300:F999-F1007. doi: ajprenal.00621.2010 [pii]10.1152/ajprenal.00621.2010
35. LaFavers KA, Macedo E, Garimella PS, Lima C, Khan S, Myslinski J, McClintick J, Witzmann FA, Winfree S, Phillips CL, et al. Circulating uromodulin inhibits systemic oxidative stress by inactivating the TRPM2 channel. *Sci Transl Med.* 2019;11. doi: 10.1126/scitranslmed.aaw3639
36. Mansour SG, Liu C, Jia Y, Reese PP, Hall IE, El-Achkar TM, LaFavers KA, Obeid W, Rosenberg AZ, Daneshpajouhnejad P, et al. Uromodulin to Osteopontin Ratio in Deceased Donor Urine is Associated with Kidney Graft Outcomes. *Transplantation.* 2020. doi: 10.1097/TP.0000000000003299
37. El-Achkar TM, Wu XR, Rauchman M, McCracken R, Kiefer S, Dagher PC. Tamm-Horsfall protein protects the kidney from ischemic injury by decreasing inflammation and altering TLR4 expression. *Am J Physiol Renal Physiol.* 2008;295:F534-544.
38. Micanovic R, Chitteti BR, Dagher PC, Srour EF, Khan S, Hato T, Lyle A, Tong Y, Wu XR, El-Achkar TM. Tamm-Horsfall Protein Regulates Granulopoiesis and Systemic Neutrophil Homeostasis. *J Am Soc Nephrol.* 2015;26:2172-2182. doi: ASN.2014070664 [pii]10.1681/ASN.2014070664
39. Micanovic R, Khan S, Janosevic D, Lee ME, Hato T, Srour EF, Winfree S, Ghosh J, Tong Y, Rice SE, et al. Tamm-Horsfall Protein Regulates Mononuclear Phagocytes in the Kidney. *J Am Soc Nephrol.* 2018;29:841-856. doi: 10.1681/ASN.2017040409
40. Patidar KR, Garimella PS, Macedo E, Slaven JE, Ghabril MS, Weber RE, Anderson M, Orman ES, Nephew LD, Desai AP, et al. Admission plasma uromodulin and the risk of acute kidney injury in hospitalized patients with cirrhosis: a pilot study. *Am J Physiol Gastrointest Liver Physiol.* 2019;317:G447-g452. doi: 10.1152/ajpgi.00158.2019
41. Delgado GE, Kleber ME, Scharnagl H, Kramer BK, Marz W, Scherberich JE. Serum Uromodulin and Mortality Risk in Patients Undergoing Coronary Angiography. *J Am Soc Nephrol.* 2017. doi: ASN.2016111162 [pii]10.1681/ASN.2016111162
42. Leiherer A, Muendlein A, Saely CH, Brandtner EM, Geiger K, Fraunberger P, Drexel H. The value of uromodulin as a new serum marker to predict decline in renal function. *J Hypertens.* 2018;36:110-118. doi: 10.1097/HJH.0000000000001527
43. Scherberich JE, Gruber R, Nockher WA, Christensen EI, Schmitt H, Herbst V, Block M, Kaden J, Schlumberger W. Serum uromodulin-a marker of kidney function and renal parenchymal integrity. *Nephrol Dial Transplant.* 2018;33:284-295. doi: 10.1093/ndt/gfw422
44. Steubl D, Block M, Herbst V, Nockher WA, Schlumberger W, Satanovskij R, Angermann S, Hasenau AL, Stecher L, Heemann U, et al. Plasma Uromodulin Correlates With Kidney Function and Identifies Early Stages in Chronic Kidney Disease Patients. *Medicine (Baltimore).* 2016;95:e3011. doi: 10.1097/MD.0000000000003011

45. Steubl D, Block M, Herbst V, Schlumberger W, Nockher A, Angermann S, Schmaderer C, Heemann U, Renders L, Scherberich J. Serum uromodulin predicts graft failure in renal transplant recipients. *Biomarkers*. 2017;22:171-177. doi: 10.1080/1354750X.2016.1252957
46. Steubl D, Buzkova P, Garimella PS, Ix JH, Devarajan P, Bennett MR, Chaves PHM, Shlipak MG, Bansal N, Sarnak MJ. Association of Serum Uromodulin With ESKD and Kidney Function Decline in the Elderly: The Cardiovascular Health Study. *Am J Kidney Dis*. 2019;74:501-509. doi: 10.1053/j.ajkd.2019.02.024
47. Steubl D, Schneider MP, Meiselbach H, Nadal J, Schmid MC, Saritas T, Krane V, Sommerer C, Baid-Agrawal S, Voelkl J, et al. Association of Serum Uromodulin with Death, Cardiovascular Events, and Kidney Failure in CKD. *Clin J Am Soc Nephrol*. 2020;15:616-624. doi: 10.2215/CJN.11780919
48. Micanovic R, LaFavers KA, Patidar KR, Ghabril MS, Doud EH, Mosley AL, Sabo AR, Khan S, El-Achkar TM. The kidney releases a nonpolymerizing form of uromodulin in the urine and circulation that retains the external hydrophobic patch domain. *Am J Physiol Renal Physiol*. 2022;322:F403-F418. doi: 10.1152/ajprenal.00322.2021
49. Gao G, Wang W, Tadagavadi RK, Briley NE, Love MI, Miller BA, Reeves WB. TRPM2 mediates ischemic kidney injury and oxidant stress through RAC1. *J Clin Invest*. 2014;124:4989-5001. doi: 76042 [pii]10.1172/JCI76042
50. Takahashi N, Kozai D, Kobayashi R, Ebert M, Mori Y. Roles of TRPM2 in oxidative stress. *Cell Calcium*. 2011;50:279-287. doi: 10.1016/j.ceca.2011.04.006
51. Dawnay AB, Cattell WR. Serum Tamm-Horsfall glycoprotein levels in health and in renal disease. *Clin Nephrol*. 1981;15:5-8.
52. Fried L, Solomon C, Shlipak M, Seliger S, Stehman-Breen C, Bleyer AJ, Chaves P, Furberg C, Kuller L, Newman A. Inflammatory and prothrombotic markers and the progression of renal disease in elderly individuals. *J Am Soc Nephrol*. 2004;15:3184-3191. doi: 10.1097/01.ASN.0000146422.45434.35
53. Tian N, Penman AD, Manning RD, Jr., Flessner MF, Mawson AR. Association between circulating specific leukocyte types and incident chronic kidney disease: the Atherosclerosis Risk in Communities (ARIC) study. *Journal of the American Society of Hypertension : JASH*. 2012;6:100-108. doi: 10.1016/j.jash.2011.10.001
54. Delgado GE, Kleber ME, Scharnagl H, Kramer BK, Marz W, Scherberich JE. Serum Uromodulin and Mortality Risk in Patients Undergoing Coronary Angiography. *J Am Soc Nephrol*. 2017;28:2201-2210. doi: 10.1681/ASN.2016111162
55. Steubl D, Buzkova P, Garimella PS, Ix JH, Devarajan P, Bennett MR, Chaves PHM, Shlipak MG, Bansal N, Sarnak MJ. Association of serum uromodulin with mortality and cardiovascular disease in the elderly-the Cardiovascular Health Study. *Nephrol Dial Transplant*. 2020;35:1399-1405. doi: 10.1093/ndt/gfz008
56. Then C, Then HL, Lechner A, Thorand B, Meisinger C, Heier M, Peters A, Koenig W, Rathmann W, Scherberich J, et al. Serum uromodulin and risk for cardiovascular morbidity and mortality in the community-based KORA F4 study. *Atherosclerosis*. 2020;297:1-7. doi: 10.1016/j.atherosclerosis.2020.01.030
57. Then C, Thorand B, Then HL, Meisinger C, Heier M, Peters A, Koenig W, Rathmann W, Bidlingmaier M, Lechner A, et al. Serum uromodulin is inversely associated with arterial hypertension and the vasoconstrictive prohormone CT-proET-1 in the population-based KORA F4 study. *PLoS One*. 2020;15:e0237364. doi: 10.1371/journal.pone.0237364
58. Venkatachalam MA, Weinberg JM, Kriz W, Bidani AK. Failed Tubule Recovery, AKI-CKD Transition, and Kidney Disease Progression. *J Am Soc Nephrol*. 2015;26:1765-1776. doi: 10.1681/ASN.2015010006

59. Ferenbach DA, Bonventre JV. Mechanisms of maladaptive repair after AKI leading to accelerated kidney ageing and CKD. *Nat Rev Nephrol.* 2015;11:264-276. doi: 10.1038/nrneph.2015.3
60. Coca SG, Singanamala S, Parikh CR. Chronic kidney disease after acute kidney injury: a systematic review and meta-analysis. *Kidney Int.* 2012;81:442-448. doi: 10.1038/ki.2011.379
61. Hsu RK, Hsu CY. The Role of Acute Kidney Injury in Chronic Kidney Disease. *Semin Nephrol.* 2016;36:283-292. doi: 10.1016/j.semnephrol.2016.05.005
62. Hsu CY, Chinchilli VM, Coca S, Devarajan P, Ghahramani N, Go AS, Hsu RK, Ikizler TA, Kaufman J, Liu KD, et al. Post-Acute Kidney Injury Proteinuria and Subsequent Kidney Disease Progression: The Assessment, Serial Evaluation, and Subsequent Sequelae in Acute Kidney Injury (ASSESS-AKI) Study. *JAMA Intern Med.* 2020;180:402-410. doi: 10.1001/jamainternmed.2019.6390
63. Basile DP, Bonventre JV, Mehta R, Nangaku M, Unwin R, Rosner MH, Kellum JA, Ronco C, Group AXW. Progression after AKI: Understanding Maladaptive Repair Processes to Predict and Identify Therapeutic Treatments. *J Am Soc Nephrol.* 2016;27:687-697. doi: 10.1681/ASN.2015030309
64. E Oh, Humphreys BD. Fibrotic Changes Mediating Acute Kidney Injury to Chronic Kidney Disease Transition. *Nephron.* 2017;137:264-267. doi: 10.1159/000474960
65. Strausser SA, Nakano D, Souma T. Acute kidney injury to chronic kidney disease transition: insufficient cellular stress response. *Curr Opin Nephrol Hypertens.* 2018;27:314-322. doi: 10.1097/MNH.0000000000000424
66. Maydan O, McDade PG, Liu Y, Wu XR, Matsell DG, Eddy AA. Uromodulin deficiency alters tubular injury and interstitial inflammation but not fibrosis in experimental obstructive nephropathy. *Physiol Rep.* 2018;6:e13654. doi: 10.14814/phy2.13654
67. Humphreys BD, Xu F, Sabbisetti V, Grgic I, Movahedi Naini S, Wang N, Chen G, Xiao S, Patel D, Henderson JM, et al. Chronic epithelial kidney injury molecule-1 expression causes murine kidney fibrosis. *J Clin Invest.* 2013;123:4023-4035. doi: 10.1172/JCI45361
68. Puthumana J, Thiessen-Philbrook H, Xu L, Coca SG, Garg AX, Himmelfarb J, Bhatraju PK, Ikizler TA, Siew ED, Ware LB, et al. Biomarkers of inflammation and repair in kidney disease progression. *J Clin Invest.* 2021;131. doi: 10.1172/JCI139927
69. Ponte B, Sadler MC, Olinger E, Vollenweider P, Bochud M, Padmanabhan S, Hayward C, Kutalik Z, Devuyst O. Mendelian randomization to assess causality between uromodulin, blood pressure and chronic kidney disease. *Kidney Int.* 2021;100:1282-1291. doi: 10.1016/j.kint.2021.08.032
70. Sjaarda J, Gerstein HC, Yusuf S, Treleaven D, Walsh M, Mann JFE, Hess S, Pare G. Blood HER2 and Uromodulin as Causal Mediators of CKD. *J Am Soc Nephrol.* 2018;29:1326-1335. doi: 10.1681/ASN.2017070812
71. Padmanabhan S, Graham L, Ferreri NR, Graham D, McBride M, Dominiczak AF. Uromodulin, an emerging novel pathway for blood pressure regulation and hypertension. *Hypertension.* 2014;64:918-923. doi: 10.1161/HYPERTENSIONAHA.114.03132
72. Liu Y, El-Achkar TM, Wu XR. Tamm-Horsfall protein regulates circulating and renal cytokines by affecting glomerular filtration rate and acting as a urinary cytokine trap. *J Biol Chem.* 2012;287:16365-16378. doi: 10.1074/jbc.M112.348243
73. Ledo N, Ko YA, Park AS, Kang HM, Han SY, Choi P, Susztak K. Functional genomic annotation of genetic risk loci highlights inflammation and epithelial biology networks in CKD. *J Am Soc Nephrol.* 2015;26:692-714. doi: 10.1681/ASN.2014010028
74. Tamm I, Horsfall FL, Jr. A mucoprotein derived from human urine which reacts with influenza, mumps, and Newcastle disease viruses. *J Exp Med.* 1952;95:71-97. doi: 10.1084/jem.95.1.71
75. Tamm I, Horsfall FL, Jr. Characterization and separation of an inhibitor of viral hemagglutination present in urine. *Proc Soc Exp Biol Med.* 1950;74:106-108.

76. Muchmore AV, Decker JM. Uromodulin. An immunosuppressive 85-kilodalton glycoprotein isolated from human pregnancy urine is a high affinity ligand for recombinant interleukin 1 alpha. *J Biol Chem*. 1986;261:13404-13407.
77. Sandberg T, Fasth A. Association between fever and the antibody response to Tamm-Horsfall protein in urinary tract infection. *Scand J Urol Nephrol*. 1987;21:297-300. doi: 10.3109/00365598709180786
78. Fasth A, Bengtsson U, Kaijser B, Wieslander J. Antibodies to Tamm-Horsfall protein associated with renal damage and urinary tract infections in adults. *Kidney Int*. 1981;20:500-504. doi: 10.1038/ki.1981.167
79. Reinhart HH, Spencer JR, Zaki NF, Sobel JD. Quantitation of urinary Tamm-Horsfall protein in children with urinary tract infection. *Eur Urol*. 1992;22:194-199. doi: 10.1159/000474754
80. Reinhart HH, Obedeanu N, Robinson R, Korzeniowski O, Kaye D, Sobel JD. Urinary excretion of Tamm-Horsfall protein in elderly women. *J Urol*. 1991;146:806-808. doi: 10.1016/s0022-5347(17)37926-0
81. Pak J, Pu Y, Zhang ZT, Hasty DL, Wu XR. Tamm-Horsfall protein binds to type 1 fimbriated *Escherichia coli* and prevents *E. coli* from binding to uroplakin Ia and Ib receptors. *J Biol Chem*. 2001;276:9924-9930. doi: 10.1074/jbc.M008610200
82. Hawthorn LA, Bruce AW, Reid G. Ability of uropathogens to bind to Tamm-Horsfall protein-coated renal tubular cells. *Urol Res*. 1991;19:301-304. doi: 10.1007/BF00299064
83. Dall'Olio F, de Kanter FJ, van den Eijnden DH, Serafini-Cessi F. Structural analysis of the preponderant high-mannose oligosaccharide of human Tamm-Horsfall glycoprotein. *Carbohydr Res*. 1988;178:327-332. doi: 10.1016/0008-6215(88)80123-x
84. Cavallone D, Malagolini N, Monti A, Wu XR, Serafini-Cessi F. Variation of high mannose chains of Tamm-Horsfall glycoprotein confers differential binding to type 1-fimbriated *Escherichia coli*. *J Biol Chem*. 2004;279:216-222. doi: 10.1074/jbc.M308821200
85. Leeker A, Kreft B, Sandmann J, Bates J, Wasenauer G, Muller H, Sack K, Kumar S. Tamm-Horsfall protein inhibits binding of S- and P-fimbriated *Escherichia coli* to human renal tubular epithelial cells. *Exp Nephrol*. 1997;5:38-46.
86. Mo L, Zhu XH, Huang HY, Shapiro E, Hasty DL, Wu XR. Ablation of the Tamm-Horsfall protein gene increases susceptibility of mice to bladder colonization by type 1-fimbriated *Escherichia coli*. *Am J Physiol Renal Physiol*. 2004;286:F795-802. doi: 10.1152/ajprenal.00357.2003
87. Saemann MD, Weichhart T, Horl WH, Zlabinger GJ. Tamm-Horsfall protein: a multilayered defence molecule against urinary tract infection. *Eur J Clin Invest*. 2005;35:227-235. doi: 10.1111/j.1365-2362.2005.01483.x
88. Garimella PS, Bartz TM, Ix JH, Chonchol M, Shlipak MG, Devarajan P, Bennett MR, Sarnak MJ. Urinary Uromodulin and Risk of Urinary Tract Infections: The Cardiovascular Health Study. *Am J Kidney Dis*. 2017;69:744-751. doi: 10.1053/j.ajkd.2016.08.022
89. van der Starre WE, van Nieuwkoop C, Thomson U, Zijderveld-Voshart MS, Koopman JP, van der Reijden TJ, van Dissel JT, van de Vosse E. Urinary proteins, vitamin D and genetic polymorphisms as risk factors for febrile urinary tract infection and relation with bacteremia: a case control study. *PLoS One*. 2015;10:e0121302. doi: 10.1371/journal.pone.0121302
90. Ghirotto S, Tassi F, Barbujani G, Pattini L, Hayward C, Vollenweider P, Bochud M, Rampoldi L, Devuyst O. The Uromodulin Gene Locus Shows Evidence of Pathogen Adaptation through Human Evolution. *J Am Soc Nephrol*. 2016;27:2983-2996. doi: 10.1681/ASN.2015070830
91. Hession C, Decker JM, Sherblom AP, Kumar S, Yue CC, Mattaliano RJ, Tizard R, Kawashima E, Schmeissner U, Heletky S, et al. Uromodulin (Tamm-Horsfall glycoprotein): a renal ligand for lymphokines. *Science*. 1987;237:1479-1484. doi: 10.1126/science.3498215
92. Hong CY, Wong NK, Abdullah M. Immunomodulatory properties of Tamm-Horsfall glycoprotein (THP) and uromodulin. *Asian Pac J Allergy Immunol*. 2015;33:26-32. doi: 10.12932/AP0463.33.1.2015

93. Rhodes DC. Binding of Tamm-Horsfall protein to complement 1q and complement 1, including influence of hydrogen-ion concentration. *Immunol Cell Biol.* 2002;80:558-566. doi: 10.1046/j.1440-1711.2002.01125.x
94. Sherblom AP, Sathyamoorthy N, Decker JM, Muchmore AV. IL-2, a lectin with specificity for high mannose glycopeptides. *J Immunol.* 1989;143:939-944.
95. Chapman MS, Lamont PH, Harkness JW. Serological evidence of continuing infection of swine in Great Britain with an influenza A virus (H3N2). *J Hyg (Lond).* 1978;80:415-422. doi: 10.1017/s0022172400024876
96. Sherblom AP, Decker JM, Muchmore AV. The lectin-like interaction between recombinant tumor necrosis factor and uromodulin. *J Biol Chem.* 1988;263:5418-5424.
97. Patras KA, Coady A, Olson J, Ali SR, RamachandraRao SP, Kumar S, Varki A, Nizet V. Tamm-Horsfall glycoprotein engages human Siglec-9 to modulate neutrophil activation in the urinary tract. *Immunol Cell Biol.* 2017;95:960-965. doi: 10.1038/icb.2017.63
98. LaFavers KA, Hage CA, Gaur V, Micanovic R, Hato T, Khan S, Winfree S, Doshi S, Moorthi RN, Twigg H, et al. The kidney protects against sepsis by producing systemic uromodulin. *Am J Physiol Renal Physiol.* 2022. doi: 10.1152/ajprenal.00146.2022
99. Lynn KL, Shenkin A, Marshall RD. Factors affecting excretion of human urinary Tamm-Horsfall glycoprotein. *Clin Sci (Lond).* 1982;62:21-26. doi: 10.1042/cs0620021
100. Catalano C, Torffvit O. Urinary excretion of Tamm-Horsfall protein in normotensive, normo-albuminuric type 1 diabetic patients. *Nephron.* 1996;72:436-441. doi: 10.1159/000188909
101. Thulesen J, Jorgensen PE, Torffvit O, Nexø E, Poulsen SS. Urinary excretion of epidermal growth factor and Tamm-Horsfall protein in three rat models with increased renal excretion of urine. *Regul Pept.* 1997;72:179-186. doi: 10.1016/s0167-0115(97)01058-6
102. Dulawa J, Kokot M, Kokot F. [Effects of furosemide, propranolol and nifedipine on urinary excretion of Tamm-Horsfall protein in patients with arterial hypertension]. *Pol Arch Med Wewn.* 1992;88:212-218.
103. Ying WZ, Sanders PW. Dietary salt regulates expression of Tamm-Horsfall glycoprotein in rats. *Kidney Int.* 1998;54:1150-1156. doi: 10.1046/j.1523-1755.1998.00117.x
104. Torffvit O, Melander O, Hulten UL. Urinary excretion rate of Tamm-Horsfall protein is related to salt intake in humans. *Nephron Physiol.* 2004;97:p31-36. doi: 10.1159/000077600
105. Du MF, Yao S, Zou T, Mu JJ, Zhang XY, Hu GL, Chu C, Jia H, Liao YY, Chen C, et al. Associations of plasma uromodulin and genetic variants with blood pressure responses to dietary salt interventions. *J Clin Hypertens (Greenwich).* 2021;23:1897-1906. doi: 10.1111/jch.14347
106. Olinger E, Lake J, Sheehan S, Schiano G, Takata T, Tokonami N, Debaix H, Consolato F, Rampoldi L, Korstanje R, et al. Hepsin-mediated Processing of Uromodulin is Crucial for Salt-sensitivity and Thick Ascending Limb Homeostasis. *Sci Rep.* 2019;9:12287. doi: 10.1038/s41598-019-48300-3
107. Mary S, Boder P, Rossitto G, Graham L, Scott K, Flynn A, Kipgen D, Graham D, Delles C. Salt loading decreases urinary excretion and increases intracellular accumulation of uromodulin in stroke-prone spontaneously hypertensive rats. *Clin Sci (Lond).* 2021;135:2749-2761. doi: 10.1042/CS20211017
108. Tokonami N, Olinger E, Debaix H, Houillier P, Devuyst O. The excretion of uromodulin is modulated by the calcium-sensing receptor. *Kidney Int.* 2018;94:882-886. doi: 10.1016/j.kint.2018.07.022
109. Rasch R, Torffvit O, Bachmann S, Jensen PK, Jacobsen NO. Tamm-Horsfall glycoprotein in streptozotocin diabetic rats: a study of kidney in situ hybridization, immunohistochemistry, and urinary excretion. *Diabetologia.* 1995;38:525-535. doi: 10.1007/BF00400720

110. Li Y, McLaren MC, McMartin KE. Involvement of urinary proteins in the rat strain difference in sensitivity to ethylene glycol-induced renal toxicity. *Am J Physiol Renal Physiol*. 2010;299:F605-615. doi: 10.1152/ajprenal.00419.2009
111. de Araujo L, Costa-Pessoa JM, de Ponte MC, Oliveira-Souza M. Sodium Oxalate-Induced Acute Kidney Injury Associated With Glomerular and Tubulointerstitial Damage in Rats. *Front Physiol*. 2020;11:1076. doi: 10.3389/fphys.2020.01076
112. Huang HS, Ma MC. High Sodium-Induced Oxidative Stress and Poor Anticrystallization Defense Aggravate Calcium Oxalate Crystal Formation in Rat Hyperoxaluric Kidneys. *PLoS One*. 2015;10:e0134764. doi: 10.1371/journal.pone.0134764
113. Malhotra R, Craven T, Ambrosius WT, Killeen AA, Haley WE, Cheung AK, Chonchol M, Sarnak M, Parikh CR, Shlipak MG, et al. Effects of Intensive Blood Pressure Lowering on Kidney Tubule Injury in CKD: A Longitudinal Subgroup Analysis in SPRINT. *Am J Kidney Dis*. 2019;73:21-30. doi: 10.1053/j.ajkd.2018.07.015
114. Steubl D, Buzkova P, Ix JH, Devarajan P, Bennett MR, Chaves PHM, Shlipak MG, Bansal N, Sarnak MJ, Garimella PS. Association of serum and urinary uromodulin and their correlates in older adults-The Cardiovascular Health Study. *Nephrology (Carlton)*. 2020;25:522-526. doi: 10.1111/nep.13688
115. Bakhoun CY, Anderson CAM, Juraschek SP, Rebholz CM, Appel LJ, Miller ER, Parikh CR, Obeid W, Rifkin DE, Ix JH, et al. The Relationship Between Urine Uromodulin and Blood Pressure Changes: The DASH-Sodium Trial. *Am J Hypertens*. 2021;34:154-156. doi: 10.1093/ajh/hpaa140
116. van Donge T, Staub E, Atkinson A, Gotta V, van den Anker J, Risch L, Welzel T, Pfister M. Age appropriate reference intervals for eight kidney function and injury markers in infants, children and adolescents. *Clin Chem Lab Med*. 2020;59:373-382. doi: 10.1515/cclm-2020-0781
117. Kottgen A, Hwang SJ, Larson MG, Van Eyk JE, Fu Q, Benjamin EJ, Dehghan A, Glazer NL, Kao WH, Harris TB, et al. Uromodulin levels associate with a common UMOD variant and risk for incident CKD. *J Am Soc Nephrol*. 2010;21:337-344. doi: 10.1681/ASN.2009070725
118. Nqebelele NU, Dickens C, Dix-Peek T, Duarte R, Naicker S. Urinary Uromodulin Levels and UMOD Variants in Black South Africans with Hypertension-Attributed Chronic Kidney Disease. *Int J Nephrol*. 2019;2019:8094049. doi: 10.1155/2019/8094049
119. Fedak D, Kuzniewski M, Fugiel A, Wieczorek-Surdacka E, Przepiorkowska-Hoyer B, Jasik P, Miarka P, Dumnicka P, Kapusta M, Solnica B, et al. Serum uromodulin concentrations correlate with glomerular filtration rate in patients with chronic kidney disease. *Pol Arch Med Wewn*. 2016;126:995-1004. doi: 10.20452/pamw.3712
120. Lv L, Wang J, Gao B, Wu L, Wang F, Cui Z, He K, Zhang L, Chen M, Zhao MH. Serum uromodulin and progression of kidney disease in patients with chronic kidney disease. *J Transl Med*. 2018;16:316. doi: 10.1186/s12967-018-1693-2
121. Zimmerhackl LB, Pfliederer S, Kinne R, Manz F, Schuler G, Brandis M. Tamm-Horsfall-Protein excretion as a marker of ascending limb transport indicates early renal tubular damage in diabetes mellitus type I. *J Diabet Complications*. 1991;5:112-114. doi: 10.1016/0891-6632(91)90037-p
122. Torffvit O, Agardh CD. Urinary excretion rate of NC1 and Tamm-Horsfall protein in the microalbuminuric type I diabetic patient. *J Diabetes Complications*. 1994;8:77-83. doi: 10.1016/1056-8727(94)90055-8
123. Pfliederer S, Zimmerhackl LB, Kinne R, Manz F, Schuler G, Brandis M. Renal proximal and distal tubular function is attenuated in diabetes mellitus type 1 as determined by the renal excretion of alpha 1-microglobulin and Tamm-Horsfall protein. *Clin Investig*. 1993;71:972-977. doi: 10.1007/BF00180026



124. Then C, Then H, Meisinger C, Heier M, Peters A, Koenig W, Rathmann W, Scherberich J, Seissler J. Serum uromodulin is associated with but does not predict type 2 diabetes in elderly KORA F4/FF4 study participants. *J Clin Endocrinol Metab.* 2019. doi: 10.1210/jc.2018-02557
125. Torffvit O, Agardh CD, Kjellsson B, Wieslander J. Tubular secretion of Tamm-Horsfall protein in type 1 (insulin-dependent) diabetes mellitus using a simplified enzyme linked immunoassay. *Clin Chim Acta.* 1992;205:31-41. doi: 10.1016/0009-8981(92)90351-p
126. Bjornstad P, Wiromrat P, Johnson RJ, Sippl R, Cherney DZI, Wong R, Rewers MJ, Snell-Bergeon JK. Serum Uromodulin Predicts Less Coronary Artery Calcification and Diabetic Kidney Disease Over 12 Years in Adults With Type 1 Diabetes: The CACTI Study. *Diabetes Care.* 2019;42:297-302. doi: 10.2337/dc18-1527
127. Torffvit O, Agardh CD. Tubular secretion of Tamm-Horsfall protein is decreased in type 1 (insulin-dependent) diabetic patients with diabetic nephropathy. *Nephron.* 1993;65:227-231. doi: 10.1159/000187479
128. Bjornstad P, Singh SK, Snell-Bergeon JK, Lovshin JA, Lytvyn Y, Lovblom LE, Rewers MJ, Boulet G, Lai V, Tse J, et al. The relationships between markers of tubular injury and intrarenal haemodynamic function in adults with and without type 1 diabetes: Results from the Canadian Study of Longevity in Type 1 Diabetes. *Diabetes Obes Metab.* 2019;21:575-583. doi: 10.1111/dom.13556
129. Kusnierz-Cabala B, Gala-Bladzinska A, Mazur-Laskowska M, Dumnicka P, Sporek M, Matuszyk A, Gil K, Ceranowicz P, Walocha J, Kucharz J, et al. Serum Uromodulin Levels in Prediction of Acute Kidney Injury in the Early Phase of Acute Pancreatitis. *Molecules.* 2017;22. doi: 10.3390/molecules22060988
130. Bennett MR, Pyles O, Ma Q, Devarajan P. Preoperative levels of urinary uromodulin predict acute kidney injury after pediatric cardiopulmonary bypass surgery. *Pediatr Nephrol.* 2018;33:521-526. doi: 10.1007/s00467-017-3823-0
131. Askenazi DJ, Koralkar R, Hundley HE, Montesanti A, Parwar P, Sonjara S, Ambalavanan N. Urine biomarkers predict acute kidney injury in newborns. *J Pediatr.* 2012;161:270-275 e271. doi: 10.1016/j.jpeds.2012.02.007
132. Askenazi DJ, Koralkar R, Patil N, Halloran B, Ambalavanan N, Griffin R. Acute Kidney Injury Urine Biomarkers in Very Low-Birth-Weight Infants. *Clin J Am Soc Nephrol.* 2016;11:1527-1535. doi: 10.2215/CJN.13381215
133. Zhang H, Lang H, Ma M, Yu M, Chai H, Hu Y, Chen W, Chen X. Decreased preoperative urinary uromodulin as a predictor of acute kidney injury and perioperative kidney dysfunction in patients undergoing cardiac surgery: A prospective cohort study. *Clin Chim Acta.* 2022;530:1-7. doi: 10.1016/j.cca.2022.02.008
134. Sweetman DU, Onwuneme C, Watson WR, O'Neill A, Murphy JF, Molloy EJ. Renal function and novel urinary biomarkers in infants with neonatal encephalopathy. *Acta Paediatr.* 2016;105:e513-e519. doi: 10.1111/apa.13555
135. Bedair RN, Amin Ismail MM, Gaber EW, Kader Mahmoud RA, Mowafy MN. Study of the relationship between urinary level of uromodulin, renal involvement and disease activity in patients with systemic lupus erythematosus. *Saudi J Kidney Dis Transpl.* 2020;31:32-43. doi: 10.4103/1319-2442.279959
136. Jaggi M, Nakagawa Y, Zipperle L, Hess B. Tamm-Horsfall protein in recurrent calcium kidney stone formers with positive family history: abnormalities in urinary excretion, molecular structure and function. *Urol Res.* 2007;35:55-62. doi: 10.1007/s00240-007-0083-7
137. Wai-Hoe L, Wing-Seng L, Ismail Z, Lay-Harn G. Proteomics and detection of uromodulin in first-time renal calculi patients and recurrent renal calculi patients. *Appl Biochem Biotechnol.* 2009;159:221-232. doi: 10.1007/s12010-008-8503-x
138. Romero MC, Nocera S, Nesse AB. Decreased Tamm-Horsfall protein in lithiasic patients. *Clin Biochem.* 1997;30:63-67. doi: 10.1016/s0009-9120(96)00136-1

139. Singh PP, Pendse AK, Rathore V, Dashora PK. Urinary biochemical profile of patients with ureteric calculi in Jodhpur region (north western India). *Urol Res*. 1988;16:105-110. doi: 10.1007/BF00261966
140. Then C, Then H, Lechner A, Huth C, Meisinger C, Heier M, Peters A, Koenig W, Rathmann W, Herder C, et al. Serum uromodulin is inversely associated with the metabolic syndrome in the KORA F4 study. *Endocr Connect*. 2019;8:1363-1371. doi: 10.1530/EC-19-0352
141. Canter MP, Graham CA, Heit MH, Blackwell LS, Wilkey DW, Klein JB, Merchant ML. Proteomic techniques identify urine proteins that differentiate patients with interstitial cystitis from asymptomatic control subjects. *Am J Obstet Gynecol*. 2008;198:553 e551-556. doi: 10.1016/j.ajog.2008.01.052
142. Then C, Herder C, Then H, Thorand B, Huth C, Heier M, Meisinger C, Peters A, Koenig W, Rathmann W, et al. Serum uromodulin is inversely associated with biomarkers of subclinical inflammation in the population-based KORA F4 study. *Clin Kidney J*. 2021;14:1618-1625. doi: 10.1093/ckj/sfaa165
143. Then C, Herder C, Thorand B, Sujana C, Heier M, Meisinger C, Peters A, Koenig W, Rathmann W, Roden M, et al. Association of serum uromodulin with adipokines in dependence of type 2 diabetes. *Cytokine*. 2022;150:155786. doi: 10.1016/j.cyto.2021.155786
144. Risch L, Lhotta K, Meier D, Medina-Escobar P, Nydegger UE, Risch M. The serum uromodulin level is associated with kidney function. *Clin Chem Lab Med*. 2014;52:1755-1761. doi: 10.1515/cclm-2014-0505
145. Then C, Then HL, Lechner A, Thorand B, Meisinger C, Heier M, Peters A, Koenig W, Rathmann W, Scherberich J, et al. Serum uromodulin and decline of kidney function in older participants of the population-based KORA F4/FF4 study. *Clin Kidney J*. 2021;14:205-211. doi: 10.1093/ckj/sfaa032
146. Troyanov S, Delmas-Frenette C, Bollee G, Youhanna S, Bruat V, Awadalla P, Devuyst O, Madore F. Clinical, Genetic, and Urinary Factors Associated with Uromodulin Excretion. *Clin J Am Soc Nephrol*. 2016;11:62-69. doi: 10.2215/CJN.04770415
147. Usui R, Ogawa T, Takahashi H, Iwasaki C, Koike M, Morito T, Hatano M, Nitta K. Serum uromodulin is a novel renal function marker in the Japanese population. *Clin Exp Nephrol*. 2021;25:28-36. doi: 10.1007/s10157-020-01964-y
148. Enko D, Meinitzer A, Scherberich JE, Marz W, Herrmann M, Artinger K, Rosenkranz AR, Zitta S. Individual uromodulin serum concentration is independent of glomerular filtration rate in healthy kidney donors. *Clin Chem Lab Med*. 2021;59:563-570. doi: 10.1515/cclm-2020-0894
149. Prajczek S, Heidenreich U, Pfaller W, Kotanko P, Lhotta K, Jennings P. Evidence for a role of uromodulin in chronic kidney disease progression. *Nephrol Dial Transplant*. 2010;25:1896-1903. doi: 10.1093/ndt/gfp748
150. Saeidi B, Koralkar R, Griffin RL, Halloran B, Ambalavanan N, Askenazi DJ. Impact of gestational age, sex, and postnatal age on urine biomarkers in premature neonates. *Pediatr Nephrol*. 2015;30:2037-2044. doi: 10.1007/s00467-015-3129-z
151. DeFreitas MJ, Seeherunvong W, Katsoufis CP, RamachandraRao S, Duara S, Yasin S, Zilleruelo G, Rodriguez MM, Abitbol CL. Longitudinal patterns of urine biomarkers in infants across gestational ages. *Pediatr Nephrol*. 2016;31:1179-1188. doi: 10.1007/s00467-016-3327-3
152. Pivin E, Ponte B, de Seigneux S, Ackermann D, Guessous I, Ehret G, Pechere-Bertschi A, Olinger E, Mohaupt M, Vogt B, et al. Uromodulin and Nephron Mass. *Clin J Am Soc Nephrol*. 2018;13:1556-1557. doi: 10.2215/CJN.03600318
153. Olden M, Corre T, Hayward C, Toniolo D, Ulivi S, Gasparini P, Pistis G, Hwang SJ, Bergmann S, Campbell H, et al. Common variants in UMOD associate with urinary uromodulin levels: a meta-analysis. *J Am Soc Nephrol*. 2014;25:1869-1882. doi: 10.1681/ASN.2013070781

154. Li Y, Cheng Y, Consolato F, Schiano G, Chong MR, Pietzner M, Nguyen NQH, Scherer N, Biggs ML, Kleber ME, et al. Genome-wide studies reveal factors associated with circulating uromodulin and its relations with complex diseases. *JCI Insight*. 2022. doi: 10.1172/jci.insight.157035
155. Joseph CB, Mariniello M, Yoshifuji A, Schiano G, Lake J, Marten J, Richmond A, Huffman JE, Campbell A, Harris SE, et al. Meta-GWAS Reveals Novel Genetic Variants Associated with Urinary Excretion of Uromodulin. *J Am Soc Nephrol*. 2022;33:511-529. doi: 10.1681/ASN.2021040491
156. Shlipak MG, Li Y, Fox C, Coresh J, Grunfeld C, Whooley M. Uromodulin concentrations are not associated with incident CKD among persons with coronary artery disease. *BMC Nephrol*. 2011;12:2. doi: 10.1186/1471-2369-12-2
157. Ponte B, Pruijm M, Ackermann D, Olinger E, Youhanna S, Vogt B, Burnier M, Pechere-Bertschi A, Bochud M, Devuyst O. Uromodulin, Salt, and 24-Hour Blood Pressure in the General Population. *Clin J Am Soc Nephrol*. 2021;16:787-789. doi: 10.2215/CJN.11230720
158. Padmanabhan S, Melander O, Johnson T, Di Blasio AM, Lee WK, Gentilini D, Hastie CE, Menni C, Monti MC, Delles C, et al. Genome-wide association study of blood pressure extremes identifies variant near UMOD associated with hypertension. *PLoS Genet*. 2010;6:e1001177. doi: 10.1371/journal.pgen.1001177
159. Stanzick KJ, Li Y, Schlosser P, Gorski M, Wuttke M, Thomas LF, Rasheed H, Rowan BX, Graham SE, Vanderweff BR, et al. Discovery and prioritization of variants and genes for kidney function in >1.2 million individuals. *Nat Commun*. 2021;12:4350. doi: 10.1038/s41467-021-24491-0
160. Garimella PS, Katz R, Ix JH, Fried LF, Kritchevsky SB, Devarajan P, Bennett MR, Parikh CR, Shlipak MG, Harris TB, et al. Association of urinary uromodulin with kidney function decline and mortality: the health ABC study. *Clin Nephrol*. 2017;87:278-286. doi: 10.5414/CN109005
161. Garimella PS, Biggs ML, Katz R, Ix JH, Bennett MR, Devarajan P, Kestenbaum BR, Siscovick DS, Jensen MK, Shlipak MG, et al. Urinary uromodulin, kidney function, and cardiovascular disease in elderly adults. *Kidney Int*. 2015;88:1126-1134. doi: 10.1038/ki.2015.192
162. Jotwani V, Garimella PS, Katz R, Malhotra R, Bates J, Cheung AK, Chonchol M, Drawz PE, Freedman BI, Haley WE, et al. Tubular Biomarkers and Chronic Kidney Disease Progression in SPRINT Participants. *Am J Nephrol*. 2020;51:797-805. doi: 10.1159/000509978
163. Steubl D, Block M, Herbst V, Nockher WA, Schlumberger W, Kemmner S, Bachmann Q, Angermann S, Wen M, Heemann U, et al. Urinary uromodulin independently predicts end-stage renal disease and rapid kidney function decline in a cohort of chronic kidney disease patients. *Medicine (Baltimore)*. 2019;98:e15808. doi: 10.1097/MD.00000000000015808
164. Bullen AL, Katz R, Lee AK, Anderson CAM, Cheung AK, Garimella PS, Jotwani V, Haley WE, Ishani A, Lash JP, et al. The SPRINT trial suggests that markers of tubule cell function in the urine associate with risk of subsequent acute kidney injury while injury markers elevate after the injury. *Kidney Int*. 2019;96:470-479. doi: 10.1016/j.kint.2019.03.024
165. Garimella PS, Jaber BL, Tighiouart H, Liangos O, Bennett MR, Devarajan P, El-Achkar TM, Sarnak MJ. Association of Preoperative Urinary Uromodulin with AKI after Cardiac Surgery. *Clin J Am Soc Nephrol*. 2017;12:10-18. doi: 10.2215/CJN.02520316
166. Garimella PS, Lee AK, Ambrosius WT, Bhatt U, Cheung AK, Chonchol M, Craven T, Hawfield AT, Jotwani V, Killeen A, et al. Markers of kidney tubule function and risk of cardiovascular disease events and mortality in the SPRINT trial. *Eur Heart J*. 2019;40:3486-3493. doi: 10.1093/eurheartj/ehz392
167. Leiherer A, Muendlein A, Saely CH, Ebner J, Brandtner EM, Fraunberger P, Drexel H. Serum uromodulin is a predictive biomarker for cardiovascular events and overall mortality in coronary patients. *Int J Cardiol*. 2017;231:6-12. doi: 10.1016/j.ijcard.2016.12.183

168. Bostom A, Steubl D, Garimella PS, Franceschini N, Roberts MB, Pasch A, Ix JH, Tuttle KR, Ivanova A, Shireman T, et al. Serum Uromodulin: A Biomarker of Long-Term Kidney Allograft Failure. *Am J Nephrol*. 2018;47:275-282. doi: 10.1159/000489095

## Supplementary tables

| Interventions                          | Kidney  |     | Urine         |         |                   |                          | Serum         | Species | Authors    | Reference number (SR) |
|----------------------------------------|---------|-----|---------------|---------|-------------------|--------------------------|---------------|---------|------------|-----------------------|
|                                        | Protein | RNA | Concentration | Western | Concentration /Cr | Secretion rate (mg/time) | Concentration |         |            |                       |
| <b>Water Handling and Diuresis</b>     |         |     |               |         |                   |                          |               |         |            |                       |
| Water Intake/loading                   |         |     |               |         |                   | ↑                        |               | H       | Lynn       | 99                    |
|                                        |         |     |               |         |                   | ↑                        |               | M       | Catalano   | 100                   |
|                                        |         |     |               |         |                   | ↔                        |               | R       | Bachmann   | 20                    |
|                                        | ↔       |     |               |         |                   |                          |               | R       | Ecelbarger | 21                    |
|                                        |         |     |               |         |                   | ↑                        |               | R       | Thulesen   | 101                   |
| Vasopressin                            | ↓       |     |               |         |                   |                          |               | R       | Ecelbarger | 21                    |
| Desmopressin                           | ↓       |     |               | ↑       |                   |                          |               | M       | Nanamatsu  | 22                    |
|                                        |         |     |               |         |                   | ↓                        |               | R       | Bachmann   | 20                    |
| Furosemide                             |         |     |               |         |                   | ↑                        |               | H       | Dulawa     | 102                   |
|                                        |         |     |               |         |                   | ↔                        |               | R       | Bachmann   | 20                    |
| Vasopressin + Furosemide               | ↑       |     |               |         |                   |                          |               | R       | Ecelbarger | 21                    |
| <b>Salt Handling and Cationic Ions</b> |         |     |               |         |                   |                          |               |         |            |                       |
| Salt intake                            | ↑       | ↑   |               |         |                   |                          |               | R       | Ying       | 103                   |
|                                        |         |     |               |         |                   | ↑                        |               | H       | Torffvit   | 104                   |
|                                        |         |     |               |         |                   | ↓                        | ↓             | H       | Du         | 105                   |
| Salt loading                           | ↔       |     |               | ↑       |                   |                          |               | M       | Olinger    | 106                   |
|                                        | ↔       | ↓   |               |         |                   | ↓                        |               | R       | Mary       | 107                   |
| CasR Activation                        |         |     |               |         | ↓                 |                          |               | H       | Tokonami   | 108                   |
| <b>Injury</b>                          |         |     |               |         |                   |                          |               |         |            |                       |
| High protein diet                      |         |     |               |         |                   | ↑                        |               | R       | Bachmann   | 20                    |
| Streptozotocin                         | ↓       | ↓   | ↑             |         |                   | ↑                        |               | R       | Rasch      | 109                   |
|                                        |         |     |               |         |                   | ↑                        |               | R       | Thulesen   | 101                   |
| IRI                                    | ↓       | ↓   |               |         |                   |                          |               | M       | Heitmeier  | 29                    |
|                                        |         | ↓   |               |         |                   |                          |               | R       | Safrstein  | 32                    |
|                                        |         | ↓   |               |         |                   |                          |               | R       | Yoshida    | 31                    |
|                                        |         |     |               |         |                   |                          | ↓             | M       | LaFavers   | 35                    |
| IRI Recovery                           | ↑       |     |               |         |                   |                          | ↑             | M       | El-Achkar  | 28                    |
| Ethylene Glycol                        |         |     | ↔             |         |                   |                          |               | R       | Li         | 110                   |
| Sodium Oxalate                         | ↓       |     |               |         |                   |                          |               | R       | de Araujo  | 111                   |
| hydroxyl-L-proline                     | ↓       |     |               |         |                   |                          |               | R       | Huang      | 112                   |
| BP Lowering                            |         |     |               |         | ↔                 |                          |               | H       | Malhotra   | 113                   |

**Table S1: Effect on experimental interventions on uromodulin expression and secretion rate and concentration in kidney urine and circulation.** Colors reflect direction of uromodulin with intervention. Blue: Decrease; Red: Increase; Grey: no change- Species: Human (H); Rat (R), Mouse (M). CasR - Calcium sensing receptor, IRI - ischemia reperfusion injury, BP - blood pressure, SR- supplemental references

| Variables               | Urine         |                  |                          |                         | Serum              | Authors         | Reference number (SR) |
|-------------------------|---------------|------------------|--------------------------|-------------------------|--------------------|-----------------|-----------------------|
|                         | Concentration | Concentration/Cr | secretion rate (mg/time) | Uromodulin per unit GFR | Concentration      |                 |                       |
| <b>Demographics</b>     |               |                  |                          |                         |                    |                 |                       |
| Sex                     | Males higher  |                  |                          |                         | Females higher     | Steubl          | 114                   |
|                         |               |                  |                          |                         | Females higher     | Delgado         | 54                    |
|                         |               |                  |                          |                         | Females higher     | Then            | 56                    |
|                         |               | Females higher   | No difference            |                         |                    | Glauser         | 15                    |
|                         | No difference | Females higher   | No difference            |                         |                    | Pruijm          | 19                    |
|                         | No difference |                  |                          |                         |                    | Bakhoun         | 115                   |
|                         |               |                  |                          |                         | Females higher     | Scherberich     | 43                    |
| Age                     |               |                  |                          |                         | None, older adults | Thornley        | 16                    |
|                         |               |                  |                          |                         | - older adults     | van Donge       | 116                   |
|                         |               |                  |                          |                         | - adults           | Leiherer        | 42                    |
| Body size               |               | +                |                          |                         |                    | Delgado         | 54                    |
|                         |               |                  | None                     |                         |                    | Glauser         | 15                    |
|                         |               |                  |                          |                         |                    | Thornley        | 16                    |
| <b>Disease</b>          |               |                  |                          |                         |                    |                 |                       |
| CKD                     |               |                  | -                        |                         |                    | Lynn            | 18                    |
|                         |               | -                | -                        | +                       | -                  | Thornely        | 16                    |
|                         |               |                  |                          |                         | -                  | Leiherer        | 42                    |
|                         |               |                  |                          |                         | -                  | Sjaarda         | 70                    |
|                         | +             |                  |                          |                         |                    | Kottgen         | 117                   |
|                         | -             |                  | -                        |                         |                    | Nqebelele       | 118                   |
|                         |               |                  |                          |                         | -                  | Fedak           | 119                   |
| ESKD                    |               |                  |                          | -                       | -                  | Lv              | 120                   |
| Early Diabetes          |               |                  | +                        |                         |                    | Zimmerhackl     | 121                   |
|                         |               |                  | +                        |                         |                    | Torffvit        | 122                   |
|                         |               |                  | +                        |                         |                    | Pfleiderer      | 123                   |
| Diabetes                |               |                  |                          |                         | -                  | Then            | 124                   |
|                         | -             |                  |                          |                         | None               | Steubl          | 114                   |
|                         |               |                  | None                     |                         |                    | Torffvit        | 125                   |
|                         |               |                  |                          |                         | -                  | Delgado         | 54                    |
| Diabetic kidney disease |               |                  |                          |                         | -                  | Bjornstad       | 126                   |
|                         |               |                  | -                        |                         |                    | Torffvit        | 127                   |
|                         |               |                  |                          |                         | -                  | Bjornstad       | 128                   |
| HTN                     | -             |                  |                          |                         | None               | Steubl          | 114                   |
|                         |               |                  |                          |                         | -                  | Delgado         | 54                    |
|                         |               |                  |                          |                         | -                  | Leiherer        | 42                    |
| AKI                     |               |                  |                          |                         | -                  | LaFavers        | 35                    |
|                         | -             |                  |                          |                         |                    | Mansour         | 36                    |
|                         |               |                  |                          |                         | -                  | Kusnierz-Cabala | 129                   |
|                         | -             |                  |                          |                         |                    | Bennet          | 130                   |
|                         | -             |                  |                          |                         |                    | Askenazi        | 131                   |
|                         | -             |                  |                          |                         |                    | Askenazi        | 132                   |
|                         | -             |                  |                          |                         |                    | Zhang           | 133                   |
|                         |               |                  |                          |                         | Sweetman           | 134             |                       |

|                       |      |      |   |  |   |             |     |
|-----------------------|------|------|---|--|---|-------------|-----|
| GN                    |      |      |   |  | - | Scherberich | 43  |
| SLE-nephritis         | -    |      |   |  |   | Bedair      | 135 |
|                       |      |      |   |  | - | Scherberich | 43  |
| Stone unspecified     |      |      | + |  |   | Jaggi       | 136 |
|                       |      | None |   |  |   | Thornley    | 16  |
| Stone-initial         | -    |      |   |  |   | Wai-Hoe     | 137 |
| Stone – recurrent     |      | -    |   |  |   | Romero      | 138 |
|                       | None |      |   |  |   | Wai-Hoe     | 137 |
|                       |      | -    |   |  |   | Glauser     | 15  |
|                       |      |      | + |  |   | Singh       | 139 |
| CAD                   |      |      |   |  | - | Delgado     | 54  |
| Heart failure         |      |      |   |  | - | Delgado     | 54  |
| Metabolic syndrome    |      |      |   |  | - | Then        | 140 |
| Interstitial Cystitis | -    |      |   |  |   | Canter      | 141 |

**Table S2: Demographic and disease variable association with uromodulin expression and production.**

Colored boxes reflect reported associations between demographic or disease parameters and uromodulin levels. Blue color reflects negative correlation. Red represents positive correlation. Gray denotes no significant association. Older adults defined as all groups having a mean age greater than 60 years. Adults defined as all groups having a mean age greater than 40 years. CKD - chronic kidney disease, ESKD – end stage kidney disease, HTN – hypertension, AKI – acute kidney injury, GN – glomerulonephritis, SLE – systemic lupus erythematosus, CAD – coronary artery disease

| Variables                    | Urine         |                   |                          | Uromodulin per unit GFR | Serum           | Authors     | Reference number (SR) |
|------------------------------|---------------|-------------------|--------------------------|-------------------------|-----------------|-------------|-----------------------|
|                              | Concentration | Concentration/ Cr | secretion rate (mg/time) |                         | Concentration   |             |                       |
| <b>Laboratory Parameters</b> |               |                   |                          |                         |                 |             |                       |
| SBP                          | None          |                   |                          |                         |                 | Bakhoum     | 115                   |
|                              |               |                   |                          |                         | -               | Delgado     | 54                    |
| Hypertension                 |               |                   |                          |                         | -               | Then        | 57                    |
| LDL                          |               |                   |                          |                         | +               | Delgado     | 54                    |
| HDL                          |               |                   |                          |                         | +               | Delgado     | 54                    |
| Triglycerides                |               |                   |                          |                         | -               | Delgado     | 54                    |
| Fasting glucose              |               |                   |                          |                         | -               | Delgado     | 54                    |
| HbA1c                        |               |                   |                          |                         | -               | Delgado     | 54                    |
| WBC Count                    |               |                   |                          |                         | -               | Then        | 142                   |
| CRP                          |               |                   |                          |                         | -               | Then        | 142                   |
|                              |               |                   |                          |                         | -               | Leiherer    | 42                    |
|                              |               |                   |                          |                         | -               | Steubl      | 114                   |
|                              |               |                   |                          |                         | -               | Delgado     | 54                    |
| Adipokines                   |               |                   |                          |                         | -               | Then        | 143                   |
| eGFR                         |               |                   |                          |                         | +               | Risch       | 144                   |
|                              |               |                   |                          |                         | +               | Then        | 145                   |
|                              |               |                   |                          |                         | +               | Leiherer    | 42                    |
|                              | +             |                   |                          |                         | +               | Steubl      | 114                   |
|                              |               |                   |                          |                         | +               | Steubl      | 44                    |
|                              |               |                   | +                        |                         | +               | Thornley    | 16                    |
|                              |               | +                 |                          |                         |                 | Troyanov    | 146                   |
|                              |               |                   |                          |                         | +               | Delgado     | 54                    |
|                              |               |                   |                          |                         | +               | Usui        | 147                   |
|                              |               |                   |                          |                         | +               | Fedak       | 119                   |
|                              |               |                   |                          |                         | None            | Enko        | 148                   |
|                              | +             | +                 |                          |                         |                 | Ponte       | 69                    |
|                              | +             |                   |                          |                         | None            | Prajczer    | 149                   |
|                              |               |                   |                          |                         | +               | Scherberich | 43                    |
|                              |               |                   |                          | +                       | Kusnierz-Cabala | 129         |                       |
| Cystatin C                   |               |                   |                          |                         | -               | Delgado     | 54                    |
| Renin                        |               |                   |                          |                         | -               | Delgado     | 54                    |
| Uric acid                    |               |                   |                          |                         | -               | Delgado     | 54                    |
| PTH                          |               |                   |                          |                         | -               | Delgado     | 54                    |
| Vitamin D                    |               |                   |                          |                         | +               | Delgado     | 54                    |
| Gestational Age              | +             |                   |                          |                         |                 | Saeidi      | 150                   |
|                              | +             |                   |                          |                         |                 | DeFreitas   | 151                   |
| Birth weight                 |               |                   | +                        |                         |                 | Pivin       | 152                   |
| Citrate excretion            |               | +                 |                          |                         |                 | Glaser      | 15                    |
| Coronary Calcification       |               |                   |                          |                         | -               | Bjornstad   | 126                   |
| NT-proBNP                    |               |                   |                          |                         | -               | Delgado     | 54                    |
| <b>Kidney Histology</b>      |               |                   |                          |                         |                 |             |                       |
| Tubular atrophy              | -             |                   |                          |                         | -               | Prajczer    | 149                   |
|                              |               |                   |                          | -                       |                 | Thornley    | 16                    |

**Table S3: Association of laboratory parameters with uromodulin levels.** Colored boxes reflect reported associations between laboratory parameters and uromodulin levels. Blue color reflects negative correlation.



Red represents positive correlation. Gray denotes no significant association. SBP – systolic blood pressure, LDL – low density lipoprotein, HDL – high density lipoprotein, HbA1c – Hemoglobin A1C, WBC – white blood cell, CRP – c-reactive protein, eGFR – estimated glomerular filtration rate, PTH – parathyroid hormone, NT-proBNP – N-terminal pro-brain natriuretic peptide

| Chrom<br>osome | SNP            | Gene     | Urine             |                          |                                | Kidney<br>RNA | Serum<br>Concent<br>ration | Authors  | Reference<br>number<br>(SR) |             |     |
|----------------|----------------|----------|-------------------|--------------------------|--------------------------------|---------------|----------------------------|----------|-----------------------------|-------------|-----|
|                |                |          | Concent<br>ration | Concent<br>ration<br>/Cr | secretion<br>rate<br>(mg/time) |               |                            |          |                             |             |     |
| 2              | rs2438298      | CAB39    |                   |                          |                                |               |                            | Olden    | 153                         |             |     |
| 7              | rs55791829 (C) | PRAKG2   |                   |                          |                                |               | -                          | Li       | 154                         |             |     |
|                | rs55791829 (G) |          |                   |                          |                                |               | +                          | Li       | 154                         |             |     |
| 11             | rs1532763      | SORL1    |                   |                          |                                |               |                            | Olden    | 153                         |             |     |
|                | rs2855800      | KCNJ1    |                   |                          |                                |               |                            | Olden    | 153                         |             |     |
| 15             | rs9672398 (G)  | WDR72    |                   | -                        |                                |               |                            | Joseph   | 155                         |             |     |
|                | rs9672398 (T)  |          |                   | +                        |                                |               |                            | Joseph   | 155                         |             |     |
| 16             | rs12446492 (A) | PDILT    |                   | -                        |                                |               |                            | Troyanov | 146                         |             |     |
|                | rs12446492 (T) |          |                   | +                        |                                |               |                            | Troyanov | 146                         |             |     |
|                | rs12917707 (T) | UMOD     |                   | -                        |                                |               |                            |          | Olden                       | 153         |     |
|                |                |          |                   | -                        |                                |               |                            |          | Shlipak                     | 156         |     |
|                |                |          |                   |                          |                                |               |                            | -        |                             | Delgado     | 54  |
|                |                |          | -                 | -                        |                                |               |                            |          |                             | Ponte       | 69  |
|                |                |          |                   |                          |                                |               | -                          |          |                             | Ponte       | 157 |
|                |                |          |                   |                          |                                |               |                            |          |                             |             |     |
|                | rs12917707 (G) | UMOD     |                   | +                        |                                |               |                            |          | Olden                       | 153         |     |
|                |                |          |                   | +                        |                                |               |                            |          | Shlipak                     | 156         |     |
|                |                |          |                   |                          |                                |               |                            | +        |                             | Delgado     | 54  |
|                |                |          | +                 | +                        |                                |               |                            |          |                             | Ponte       | 69  |
|                |                |          |                   |                          |                                |               | +                          |          |                             | Ponte       | 157 |
|                |                |          |                   |                          |                                |               |                            |          |                             |             |     |
|                | rs12934455 (T) | UMOD     |                   | -                        |                                |               |                            |          | Joseph                      | 155         |     |
|                | rs12934455 (C) |          |                   | +                        |                                |               |                            |          | Joseph                      | 155         |     |
|                | rs13333226 (G) | UMOD     |                   |                          | -                              |               |                            |          |                             | Padmanabhan | 158 |
|                |                |          |                   | None                     | None                           |               |                            |          |                             | Nqebelele   | 118 |
|                |                |          |                   | -                        |                                |               |                            |          |                             | Padmanabhan | 158 |
|                |                |          | None              | None                     |                                |               |                            |          |                             | Nqebelele   | 118 |
| rs13335818 (T) | UMOD           |          |                   |                          |                                |               | -                          |          | Leiherer                    | 42          |     |
|                |                |          |                   | -                        |                                |               |                            |          | Joseph                      | 155         |     |
| rs13335818 (C) | UMOD           |          |                   |                          |                                |               | +                          |          | Leiherer                    | 42          |     |
|                |                |          |                   | +                        |                                |               |                            |          | Joseph                      | 155         |     |
| rs34882080 (G) | UMOD           |          |                   |                          |                                | -             |                            | Stanzick | 159                         |             |     |
| rs34882080 (A) |                |          |                   |                          |                                | +             |                            | Stanzick | 159                         |             |     |
| rs4293393 (C)  | UMOD           |          |                   | -                        |                                |               |                            |          | Troyanov                    | 146         |     |
|                |                |          | -                 |                          |                                |               |                            |          | Kottgen                     | 117         |     |
|                |                |          |                   | +                        |                                |               |                            |          | Troyanov                    | 146         |     |
| rs4293393 (T)  | UMOD           |          | +                 |                          |                                |               |                            |          | Kottgen                     | 117         |     |
|                |                |          |                   |                          |                                |               |                            |          |                             |             |     |
| rs77924615 (A) | PDILT          |          | -                 | -                        |                                |               |                            |          | Joseph                      | 155         |     |
|                |                |          |                   |                          |                                |               | -                          |          | Stanzick                    | 159         |     |
|                |                |          |                   |                          |                                |               |                            | -        |                             | Li          | 154 |
|                |                |          | +                 | +                        |                                |               |                            |          |                             | Joseph      | 155 |
| rs77924615 (G) | PDILT          |          |                   |                          |                                | +             |                            |          | Stanzick                    | 159         |     |
|                |                |          |                   |                          |                                |               |                            | +        |                             | Li          | 154 |
| 17             | rs8067385 (C)  | KRT40    |                   | -                        |                                |               |                            |          | Joseph                      | 155         |     |
|                | rs8067385 (G)  |          |                   | +                        |                                |               |                            |          | Joseph                      | 155         |     |
|                | rs7224888 (T)  | B4GALNT2 |                   |                          |                                |               |                            | -        |                             | Li          | 154 |
|                | rs7224888 (C)  |          |                   |                          |                                |               |                            | +        |                             | Li          | 154 |

**Table S4: Association of single nucleotide polymorphism (SNP) variants with uromodulin expression and levels.** Blue and red boxes represent negative and positive correlations, respectively. Grey boxes show no association. Black box color indicates specific nucleotide variant not specified.

| Outcomes          | Urine         |                  | Serum         | Authors     | Reference number (SR) |
|-------------------|---------------|------------------|---------------|-------------|-----------------------|
|                   | Concentration | Concentration/Cr | Concentration |             |                       |
| Incident CKD      | ↔             |                  |               | Shlipak     | 156                   |
|                   |               |                  | ↓             | Leiherer    | 42                    |
|                   | ↓             |                  |               | Garimella   | 160                   |
|                   | ↓             |                  |               | Puthumana   | 68                    |
| CKD progression   | ↓             |                  |               | Garimella   | 161                   |
|                   | ↓             |                  |               | Jotwani     | 162                   |
|                   | ↓             |                  |               | Steubl      | 163                   |
|                   | ↓             |                  |               | Garimella   | 160                   |
|                   | ↓             |                  |               | Puthumana   | 68                    |
|                   |               |                  | ↓             | Steubl      | 47                    |
|                   |               |                  | ↓             | Then        | 145                   |
|                   |               | MR study, ↑      |               | Ponte       | 69                    |
| Incident AKI      |               |                  | MR study, ↑   | Sjaarda     | 70                    |
|                   | ↓             |                  | ↓             | Patidar     | 40                    |
|                   |               | ↓                |               | Bullen      | 164                   |
| Death             |               |                  |               | Garimella   | 165                   |
|                   | ↓             |                  |               | Garimella   | 161                   |
|                   | ↓             |                  |               | Garimella   | 160                   |
|                   |               |                  | ↓             | Steubl      | 47                    |
|                   |               |                  | ↓             | Steubl      | 55                    |
|                   |               |                  | ↓             | Delgado     | 54                    |
| CVD               |               |                  | ↓             | Then        | 56                    |
|                   | ↓             |                  |               | Garimella   | 166                   |
|                   |               |                  | ↓             | Steubl      | 47                    |
|                   |               |                  | ↓             | Steubl      | 55                    |
|                   |               |                  | ↓             | Then        | 56                    |
| Allograft failure |               |                  | ↓             | Leiherer    | 167                   |
| DGF               |               |                  | ↓             | Bostom      | 168                   |
| UTI               | ↓             |                  | ↓             | Scherberich | 43                    |
|                   |               |                  |               | Garimella   | 88                    |

**Table S5: Association of uromodulin levels with outcomes.** Blue and red boxes represent decreased and increase risk (adjusted for confounders). Grey box indicates no association. CKD – chronic kidney disease, AKI – acute kidney injury, CVD – cardiovascular disease, DGF – delayed graft function, UTI – urinary tract infection, MR – Mendelian randomization
